# Supplementary material for: Play Activities Are Associated with Force Regulation in Primary School
Source: MDPI journal article supplement (doi:10.3390/jfmk9010054), 2024-03-18
Supplement: s1 [file s1]

Table S1. Effects of total quantity of exercise experience on CFE

|         | TQEE Low<br>[ <i>n</i> =8] | TQEE Middle<br>[ <i>n</i> =8] | TQEE Large<br>[ <i>n</i> =7] | ANCOVA   |                 | Effect size <i>f</i> |
|---------|----------------------------|-------------------------------|------------------------------|----------|-----------------|----------------------|
|         | Mean ± SD                  | Mean ± SD                     | Mean ± SD                    | F -value | <i>p</i> -value |                      |
| CFE (%) | 1329.9 ± 547.6             | 1075.0 ± 253.6                | 1067.9 ± 302.4               | 2.83     | 0.085           | 0.561                |

covariance = Age, Maximum grip strength

ANCOVA, analysis of covariance; CFE, Controlled Force Exertion; TQEE, total quantity of exercise experience
